# Supplementary material for: An effective oxide shell-protected surface-enhanced Raman scattering (SERS) substrate: the easy route to Ag@AgxO-silicon nanowire films via surface doping
Source: Royal Society of Chemistry journal article supplement (doi:10.1039/c2tc00761d), 2012-12-21
Supplement: c2tc00761d.pdf [file c2tc00761d.pdf]

## Supporting Information

### An Effective Oxide Shell-protected Surface-enhanced Raman Scattering (SERS) Substrates: the Easy Route to Ag@Ag<sub>x</sub>O- Silicon Nanowire Films via Surface Doping

Fan Liao<sup>1</sup>, Liang Cheng<sup>1</sup>, Jing Li<sup>1</sup>, Mingwang Shao<sup>1,\*</sup>, Zhenghua Wang<sup>2</sup>, Shuit-Tong Lee<sup>1</sup>

<sup>1</sup>Institute of Functional Nano and Soft Materials (FUNSOM) & Jiangsu Key Laboratory for Carbon-based Functional Materials and Devices, Soochow University, Suzhou, Jiangsu 215123, P. R. China

<sup>2</sup>Chemistry and Materials Science, Anhui Normal University, Wuhu, 241000, P. R. China.

1. SERS spectrum on Ag@Ag<sub>x</sub>O-SiNW substrate of  $1 \times 10^{-7}$  M R6G solution and Raman spectrum of 0.1 M R6G solution

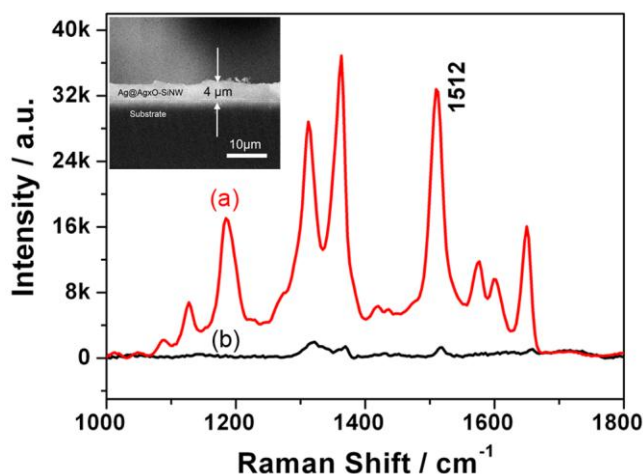

**Figure S5.** (a) SERS spectrum on Ag@Ag<sub>x</sub>O-SiNW substrate of  $1 \times 10^{-7}$  M R6G solution; and (b) the Raman spectrum of 0.1 M R6G solution. The inset is the side view of the substrate.

2. The calculation of EF

$EF = \frac{I_{sers}}{I_0} \times \frac{N_0}{N_{sers}}$  is the most widely used definition for the average SERS EF.  $I_0$  and  $I_{sers}$  are the peak intensity of regular Raman measurement with 0.1 M R6G methanol solution on ITO glass and SERS measurement with  $1 \times 10^{-7}$  M R6G methanol solution on Ag@Ag<sub>x</sub>O-SiNW substrate; and  $N_0$  is the average number of molecules in the scattering volume for the Raman measurement, and  $N_{sers}$  is the average number of adsorbed molecules in the scattering volume for the SERS experiments.

$N_0$  was derived by considering the irradiated R6G solution area  $A_{laser} (\pi r_{laser}^2$  with  $r_{laser} = 0.61\lambda_{laser}/NA$ ), the laser spot depth of focus ( $2\lambda / NA^2$ ), and its concentration  $C_0$ .  $N_A$  is Avogadro constant.

$$A_{laser} = \pi \left( \frac{0.61\lambda_{laser}}{NA} \right)^2 = \pi \left( \frac{0.61 \times 633 \times 10^{-8}}{0.9} \right)^2 = 5.78 \times 10^{-11} dm^2$$

$$N_0 = A_{laser} \times (2\lambda / NA^2) C_{sers} \times N_A = 5.44 \times 10^7$$

Sample for SERS measurement was prepared by the addition of 20  $\mu$ l of  $1 \times 10^{-7}$  M R6G methanol solution onto the given substrate, and dried in room temperature. After the solvent evaporated, the solution formed a 5 mm diameter circular liquid deposit and the probe molecules were uniformly permeated into Ag@Ag<sub>x</sub>O-SiNW with thickness of 4  $\mu$ m (inseted in figure S5). So the density of R6G molecules in the Ag@Ag<sub>x</sub>O-SiNW was  $1.533 \times 10^{19}$ ,

$$\left( \rho = \frac{20 \times 10^{-6} \times 10^{-7} \times 6.02 \times 10^{23}}{\pi \left( \frac{0.05}{2} \right)^2 \times 4 \times 10^{-5}} = 1.533 \times 10^{19} / dm^3 \right)$$

Owing to the chemical first layer enhancement, the SERS effect is distance-dependent and the SERS signal from molecules on the second monolayer is usually reduced and can be ignored [19]. Assuming laser only penetrate SiNWs surface layer and the diameter of SiNWs is 75 nm. And the R6G molecules on the SiNWs' surface was calculated as

$$1.129 \times 10^{10} \left( 1.533 \times 10^{19} \times \frac{0.075}{2} \times 10^{-5} \times \pi \left( \frac{0.05}{2} \right)^2 = 1.129 \times 10^{10} / dm^3 \right)$$

$$N_{sers} = \frac{A_{laser}}{\pi \left( \frac{0.05}{2} \right)^2} \times 1.129 \times 10^{10} = 332$$

$$EF = \frac{I_{sers}}{I_0} \times \frac{N_0}{N_{sers}} = \frac{32970}{1284} \times \frac{5.44 \times 10^7}{332} = 4.21 \times 10^6$$
